# Supplementary figures and images for: Impact of air temperature and containment measures on mitigating the intrahousehold transmission of SARS-CoV-2: a data-based modelling analysis
Source: HighWire-hosted journal article supplement (doi:10.1136/bmjopen-2021-049383), 2022-04-01

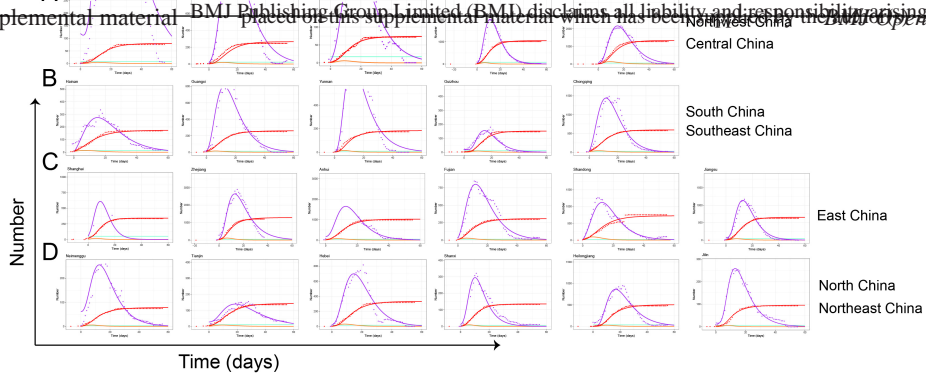

Figure S1

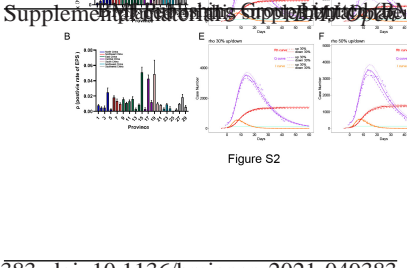

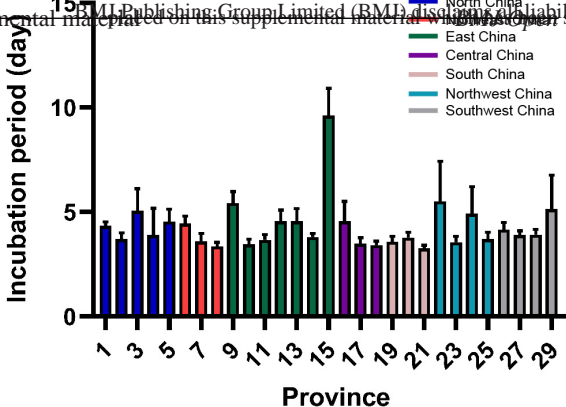

Figure S3

Supplement: bmjopen-2021-049383supp001_data_supplement.pdf [file bmjopen-2021-049383supp001_data_supplement.pdf]
